# Supplementary material
Source: HighWire-hosted journal article supplement (https://cmaj.ca/highwire/filestream/150934/field_highwire_adjunct_files/1/230760-res-f3-fc-long-desc.pdf)
Supplement: 230760-res-f3-fc-long-desc.pdf [file 230760-res-f3-fc-long-desc.pdf]

| <b>Predictor</b>                    | <b>Enrolment ratios (95% CrI)</b> |
|-------------------------------------|-----------------------------------|
| <b>Unexplained variability</b>      |                                   |
| Median enrolment ratio* by site     | 2.66 (2.46–2.90)                  |
| Median enrolment ratio* by study    | 2.71 (2.37–3.14)                  |
| <b>Hospital size</b>                |                                   |
| No. of beds, 100s                   | 1.09 (0.95–1.26)                  |
| > 5 active studies                  | 1.89 (1.08–3.29)                  |
| <b>Site research infrastructure</b> |                                   |
| Co-enrolment experience             | 0.79 (0.27–2.29)                  |
| Deferred consent experience         | 0.94 (0.47–1.86)                  |
| Coordinator available               | 0.98 (0.55–1.80)                  |
| Total FTEs                          | 0.98 (0.94–1.03)                  |
| Research pharmacy                   | 0.99 (0.30–3.31)                  |
| <b>Site affiliation</b>             |                                   |
| University hospital                 | Ref.                              |
| University-affiliated hospital      | 1.44 (0.68–3.09)                  |
| Community hospital                  | 1.57 (0.78–3.02)                  |
| <b>Region of site</b>               |                                   |
| Alberta                             | 0.85 (0.44–1.64)                  |
| BC                                  | 0.93 (0.41–2.13)                  |
| Ontario                             | Ref.                              |
| Atlantic                            | 1.04 (0.29–3.18)                  |
| Manitoba                            | 1.10 (0.36–3.33)                  |
| Saskatchewan                        | 1.20 (0.33–4.04)                  |
| Quebec                              | 1.54 (0.80–2.91)                  |
| <b>Study characteristics</b>        |                                   |
| 1 v. $\geq$ 2 coordinating centres  | 2.70 (1.12–6.51)                  |
| Observational v. interventional     | 4.67 (1.79–11.71)                 |
